# Supplementary material
Source: Royal Society of Chemistry journal article supplement (https://www.rsc.org/suppdata/cc/1999/1275/902092f.doc)
Supplement: Supplementary file 1 [file 902092f.doc]

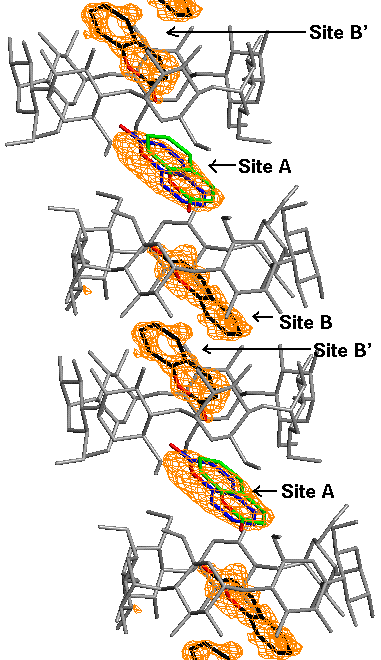
**Fig. 1** Structure of the -CD/coumarin "reaction nano-tube" with the difference electron density (Fo-Fc) in the CD overlaid. CDs are in gray while coumarin molecules are colored as follows: carbon = black; oxygen = red. Coumarin molecules at crystallographically disordered site A are colored with blue carbons for one orientation and green carbons for the other orientation. Waters of crystallization are omitted for clarity. The -CD dimer stacks are roughly parallel to the crystallographic *c*-axis. See text for details.
